# Supplementary material
Source: MDPI journal article supplement (https://www.mdpi.com/2073-4441/13/22/3252)

**Table S1.** Transformed z-score sequences

| Site            | yrs BP  |         |         |          |           |           |           |           |           |           |           |           |           |
|-----------------|---------|---------|---------|----------|-----------|-----------|-----------|-----------|-----------|-----------|-----------|-----------|-----------|
|                 | 200-400 | 400-600 | 600-800 | 800-1000 | 1000-1200 | 1200-1400 | 1400-1600 | 1600-1800 | 1800-2000 | 2000-2200 | 2200-2400 | 2400-2600 | 2600-2800 |
| Gialova lagoon  | -1.32   | -1.37   | -0.67   | 0.17     | -0.46     | 1.51      | 1.78      | 1.28      | 0.41      | 0.2       | -0.01     | 0.21      | 0.36      |
| Lake Lerna      | -0.3    | -0.63   | -0.34   | -0.11    | 0.29      | -0.56     | -1.18     | -0.64     | 0.82      | 1.34      | 1.79      | 0.21      | -1.04     |
| Aliko lagoon    | 0.84    | 0.22    | 1.26    | 1.13     | 1.35      | 0.91      | -0.43     | -0.59     | -0.5      | -0.62     | -0.64     | -0.93     | -0.08     |
| Lake Trichonida | 0.09    | 0.85    | 0.69    | 0.84     | 0.01      | 0.6       | -0.84     | 0.57      | 0.33      | -0.67     | -0.72     | -1.05     | -1.19     |
| Lake Butrint    | 0.07    | 0.83    | 0.66    | 1.13     | -0.5      | -1.3      | -1.83     | -0.48     | -0.02     | 0.04      | -0.55     | -0.4      | -0.64     |
| Lake Ohrid      | 0.18    | 1.19    | 1.52    | 1.25     | 1.02      | 0.19      | -0.31     | -0.49     | -0.26     | -0.34     | -1.54     | -0.65     | -1.17     |
| Lake Dojran     | 1.15    | 0.07    | 0.41    | 0.42     | -0.08     | -0.85     | -1.48     | -1.7      | -1.14     | -0.62     | -0.06     | -0.42     | -0.42     |
| Lake Cubuk      | -0.09   | 0.92    | -0.93   | 0.06     | 0.13      | 0.18      | 0.48      | 0.75      | 1.02      | -0.42     | -1.49     | -0.02     | 0.51      |
| Sofular cave    | 1.06    | -0.06   | -0.08   | -0.38    | -0.19     | -0.96     | 0.28      | -0.32     | 0.12      | -0.3      | -0.46     | -1.14     | -1.32     |
| Lake Golhisar   | 0.46    | 0.36    | 0.5     | 0.33     | -0.28     | -0.67     | -0.74     | -0.83     | -0.91     | -0.85     | -0.79     | -0.77     | 0.006     |
| Jeita cave      | -1.32   | -0.61   | -1.06   | 0.11     | 0.47      | 1.05      | 0.7       | 0.62      | 0.87      | 0.76      | 1.08      | -0.77     | 0.92      |
| Lake Kinneret   | -3.51   | -0.96   | -0.27   | 0.77     | 0.9       | 0.58      | 0.15      | 0.28      | 0.07      | 0.14      | 0.23      | -0.98     | 0.55      |
| Soreq cave      | 1.41    | -0.75   | -0.53   | 1.11     | -0.5      | -0.79     | -0.5      | 0.31      | 0.43      | 0.56      | 0.25      | -0.03     | -1.13     |

**Figure S1.** Maps of the eastern Mediterranean presenting z-scores for each 200-yrs step.

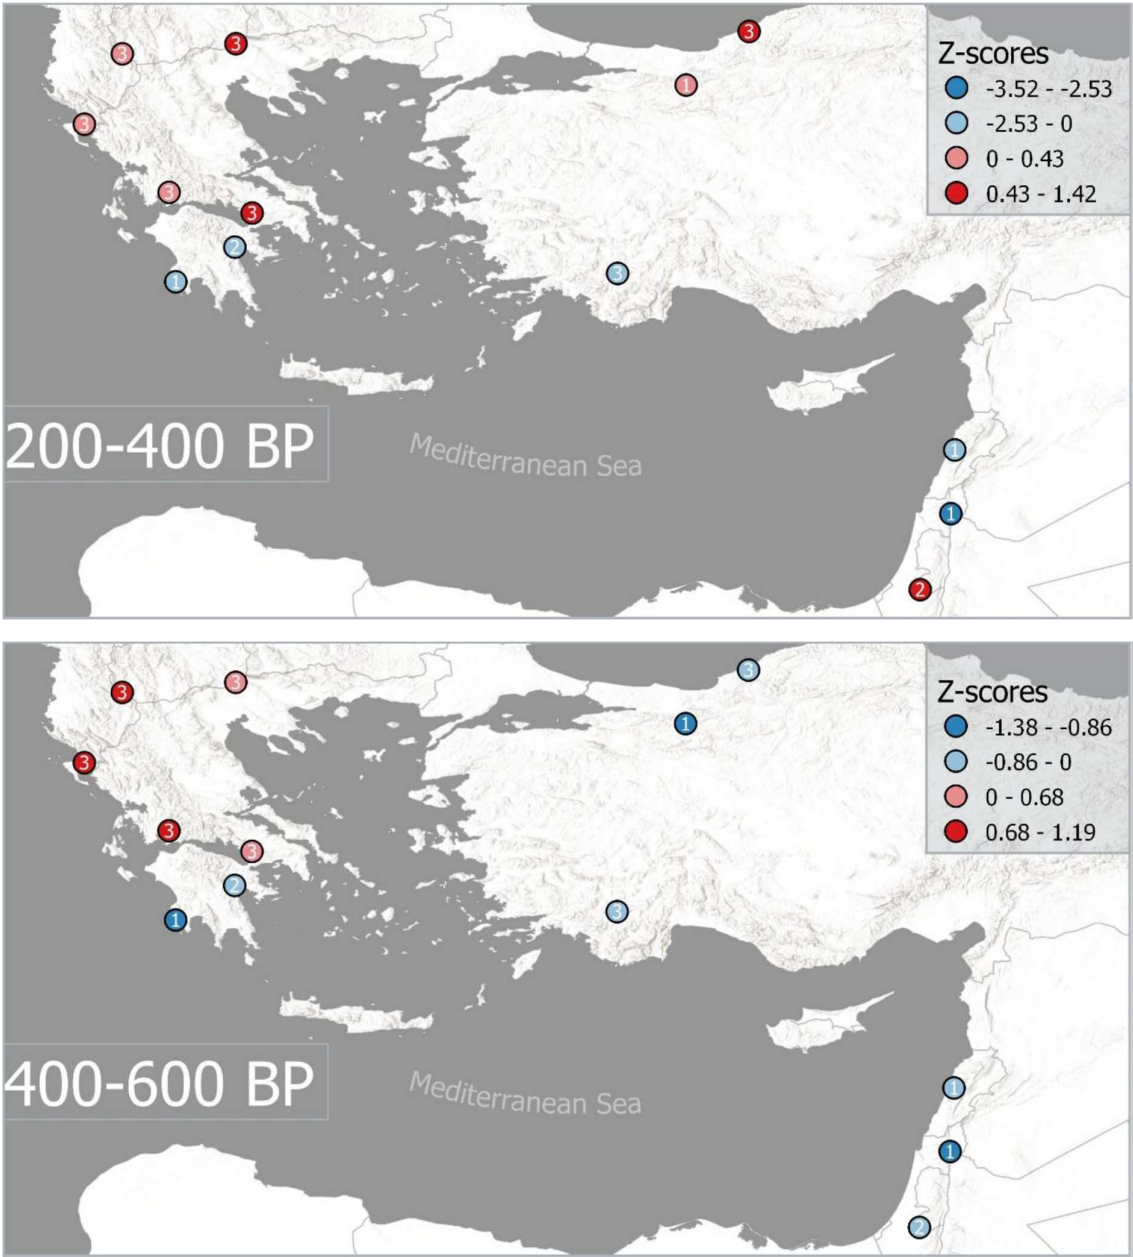

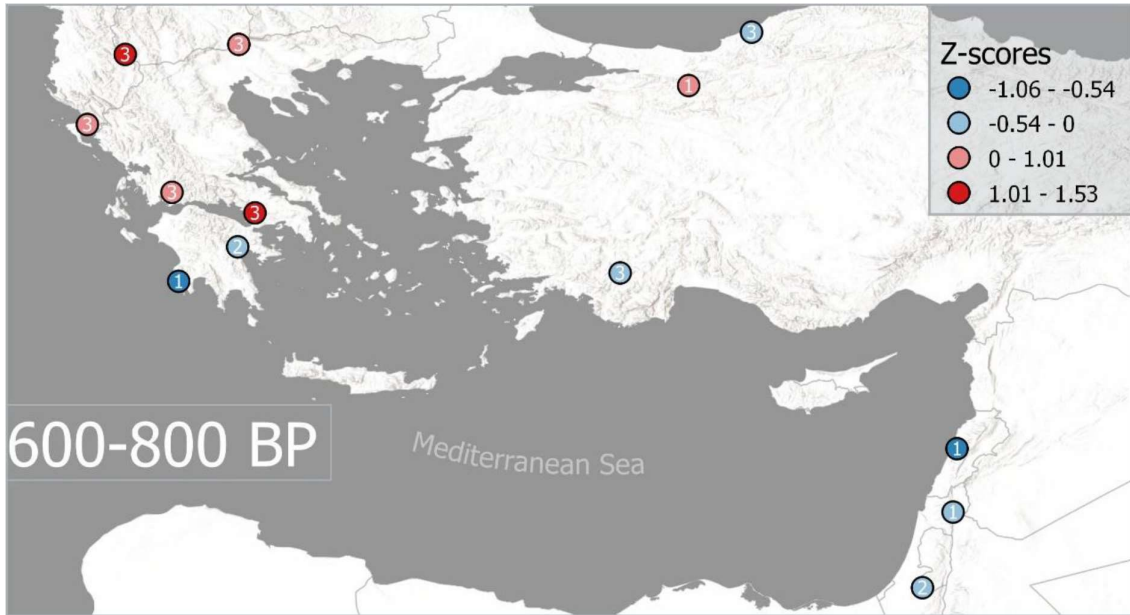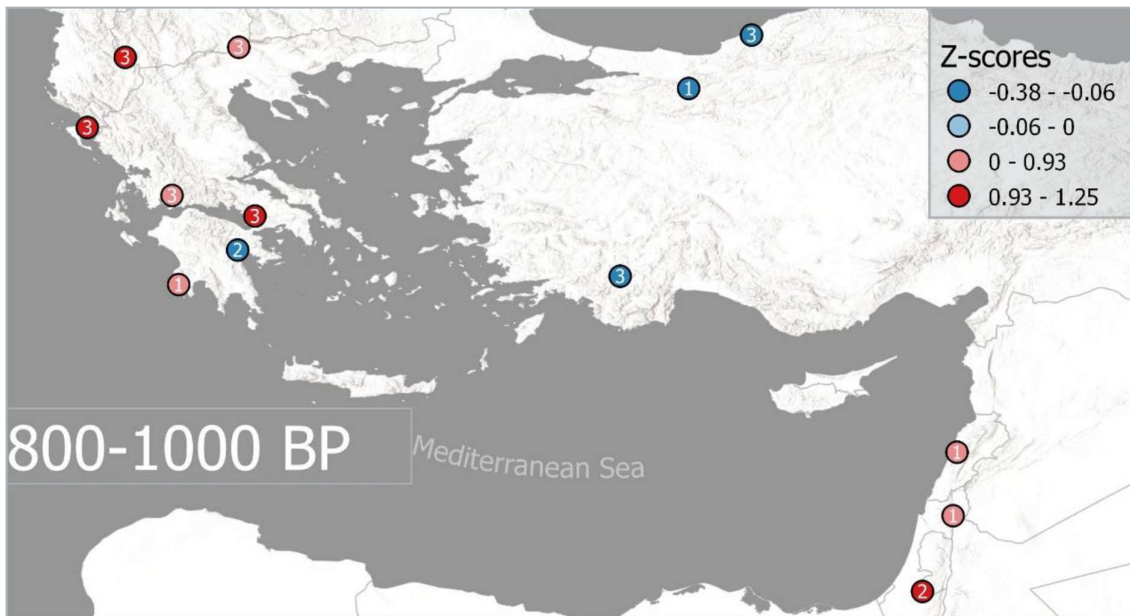

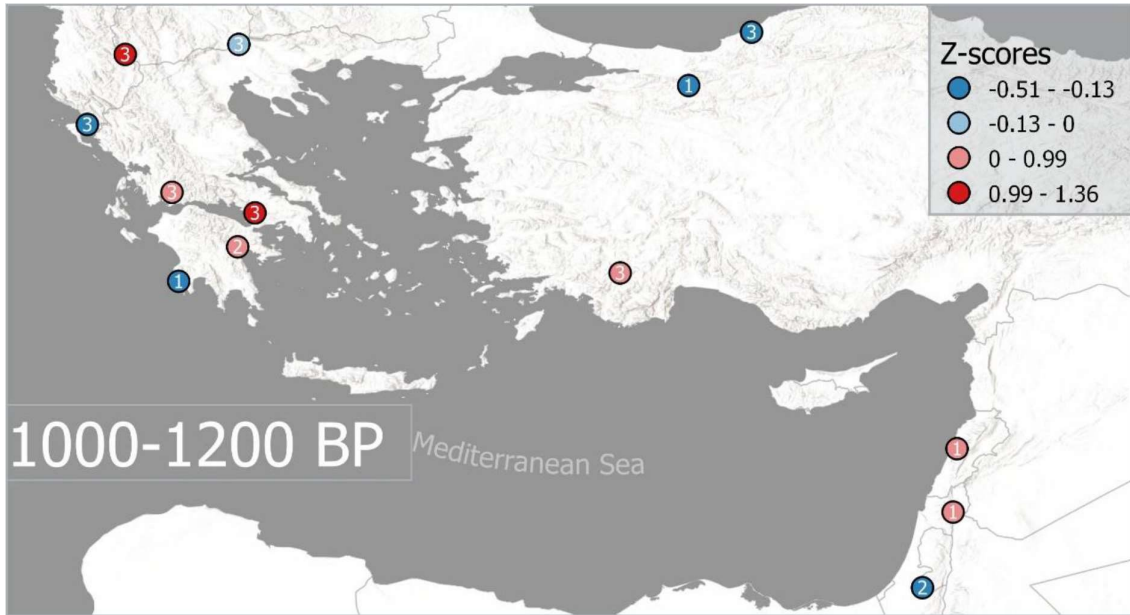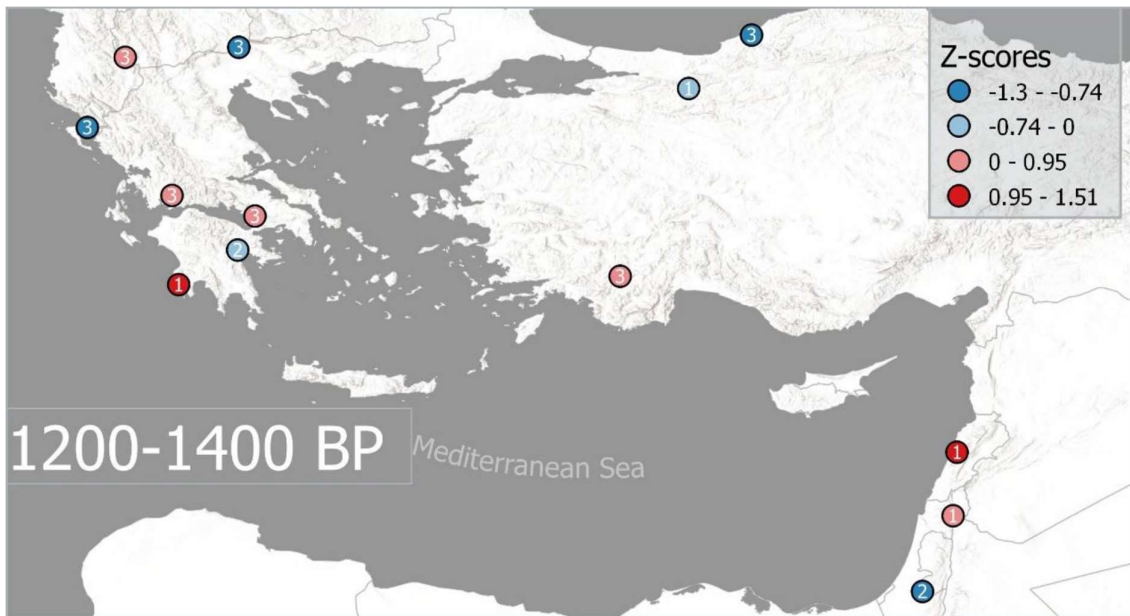

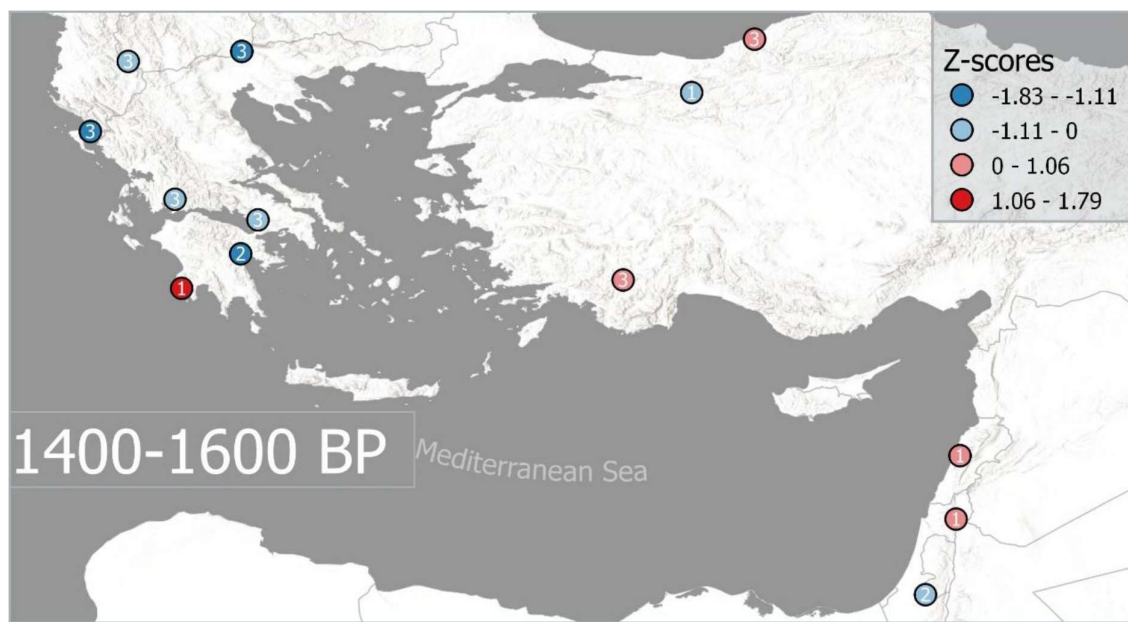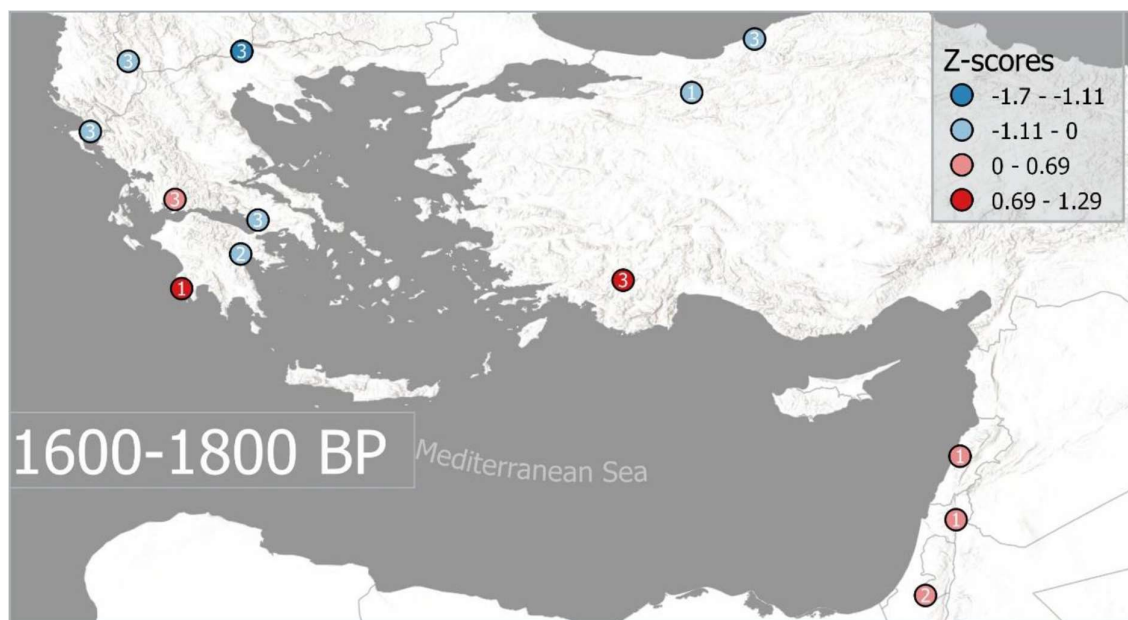



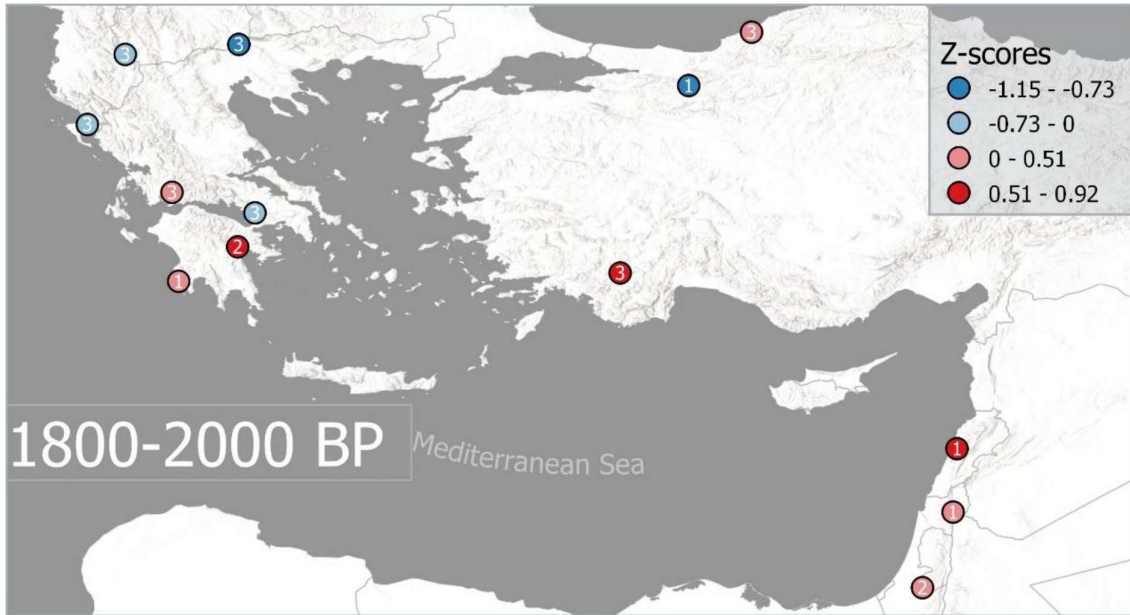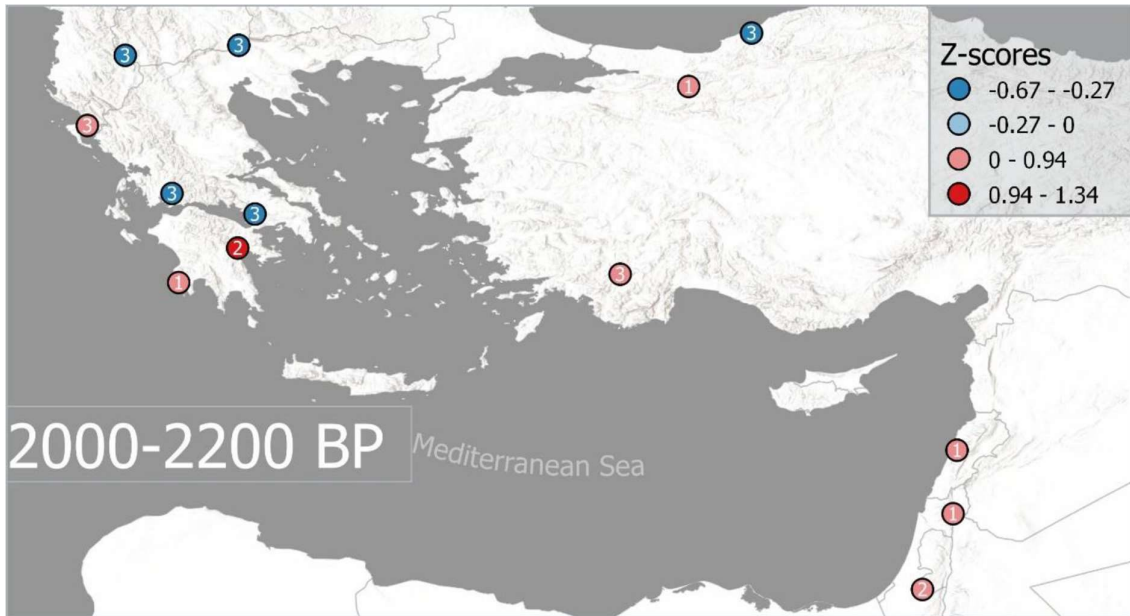

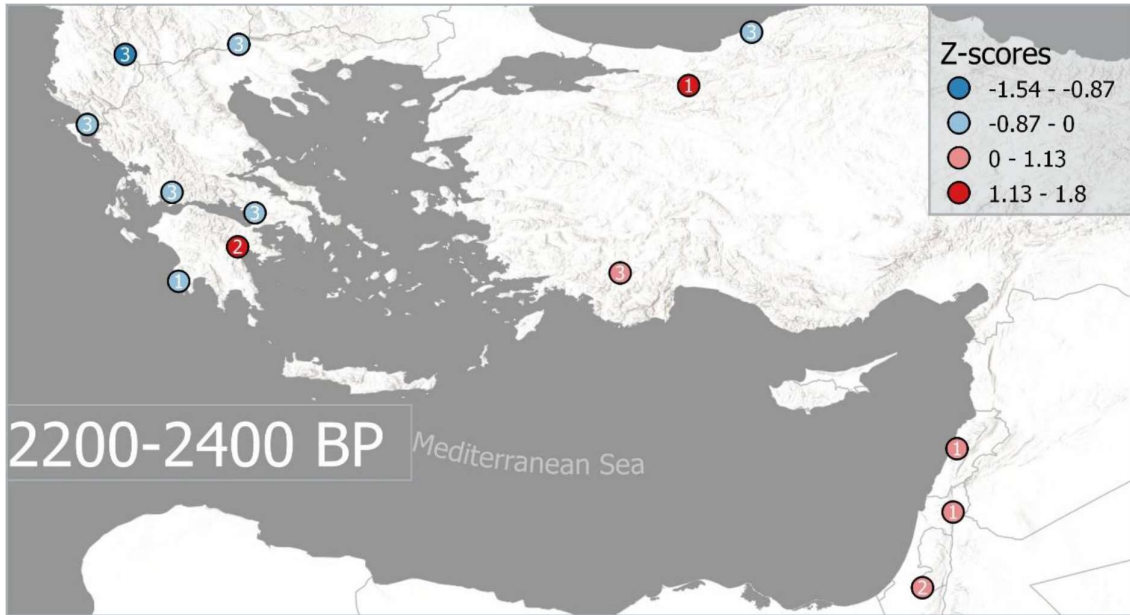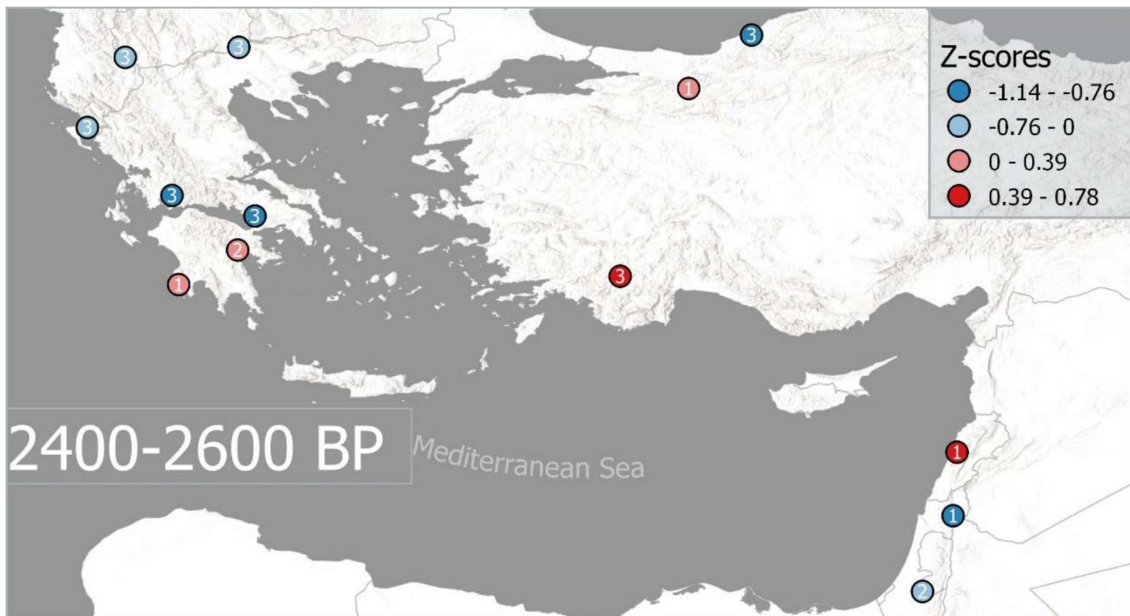

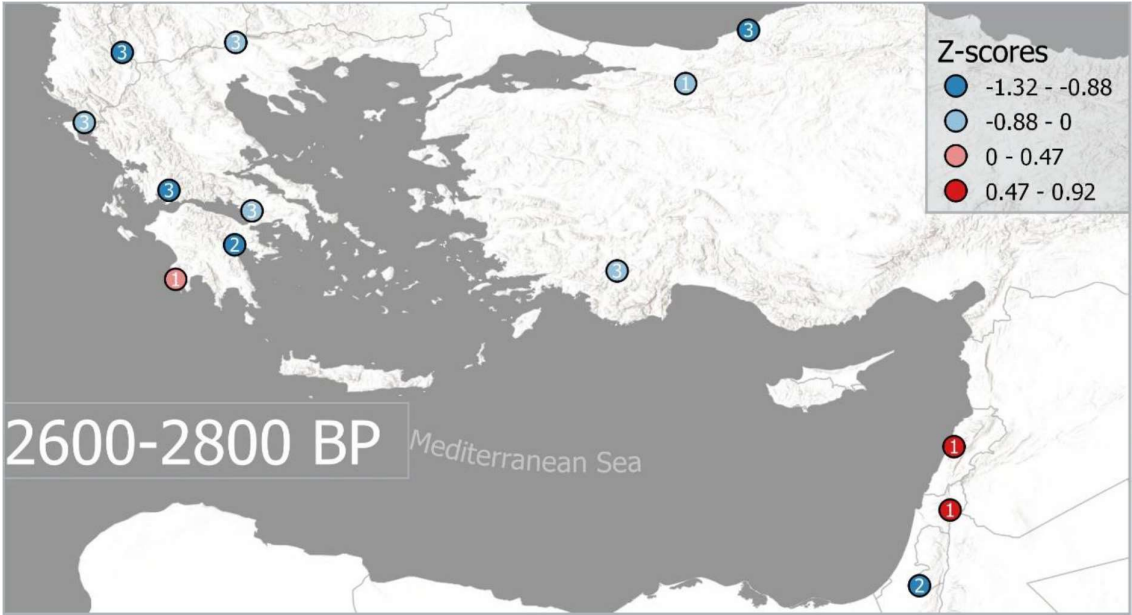

Supplement: s1 [file s1]
